# Supplementary material for: Agrobacterium Is a Proposed Suitable System for Bioassays and Resistance Studies on Antimicrobial Peptides with Plant Protection Potential
Source: Preprints.org preprint supplement (doi:10.20944/preprints202311.0120.v1), 2023-11-02
Supplement: Supplementary file 1 [file Suppl._File_5_Raw_Data_for_Fig_1AB__Peer_J_24535_Resubmission.xlsx]

## Sheet: Sheet1
OD VALUES EMA_PF2 LIQUID BIOASSAYS
ON XENORHABDUS AND E. COLI STRAINS							DOSES:
STRAIN	DOSE	Replicate	OD values
HG1789	0.0	1	0.470				0.0	µg /ml EMA PF
HG1789	0.0	2	0.487				30.0
HG1789	0.0	3	0.373				45.0
HG1789	30.0	1	0.470				60.0
HG1789	30.0	2	0.487				75.0
HG1789	30.0	3	0.373
HG1789	45.0	1	0.432
HG1789	45.0	2	0.424
HG1789	45.0	3	0.337
HG1789	60.0	1	0.442
HG1789	60.0	2	0.417
HG1789	60.0	3	0.296
HG1789	75.0	1	0.650
HG1789	75.0	2	0.394
HG1789	75.0	3	0.399
HGB1795	0.0	1	0.248
HGB1795	0.0	2	0.287
HGB1795	0.0	3	0.470
HGB1795	30.0	1	0.034
HGB1795	30.0	2	0.031
HGB1795	30.0	3	0.034
HGB1795	45.0	1	0.040
HGB1795	45.0	2	0.033
HGB1795	45.0	3	0.040
HGB1795	60.0	1	0.041
HGB1795	60.0	2	0.047
HGB1795	60.0	3	0.045
HGB1795	75.0	1	0.036
HGB1795	75.0	2	0.038
HGB1795	75.0	3	0.045
HGB081	0.0	1	0.450
HGB081	0.0	2	0.418
HGB081	0.0	3	0.470
HGB081	30.0	1	0.348
HGB081	30.0	2	0.339
HGB081	30.0	3	0.446
HGB081	45.0	1	0.391
HGB081	45.0	2	0.348
HGB081	45.0	3	0.385
HGB081	60.0	1	0.311
HGB081	60.0	2	0.312
HGB081	60.0	3	0.447
HGB081	75.0	1	0.394
HGB081	75.0	2	0.325
HGB081	75.0	3	0.504
HGB2226	0.0	1	0.272
HGB2226	0.0	2	0.243
HGB2226	0.0	3	0.301
HGB2226	30.0	1	0.076
HGB2226	30.0	2	0.067
HGB2226	30.0	3	0.083
HGB2226	45.0	1	0.059
HGB2226	45.0	2	0.054
HGB2226	45.0	3	0.063
HGB2226	60.0	1	0.061
HGB2226	60.0	2	0.074
HGB2226	60.0	3	0.055
HGB2226	75.0	1	0.069
HGB2226	75.0	2	0.063
HGB2226	75.0	3	0.075
HGB2238	0.0	1	0.450
HGB2238	0.0	2	0.460
HGB2238	0.0	3	0.515
HGB2238	30.0	1	0.297
HGB2238	30.0	2	0.311
HGB2238	30.0	3	0.319
HGB2238	45.0	1	0.312
HGB2238	45.0	2	0.310
HGB2238	45.0	3	0.281
HGB2238	60.0	1	0.281
HGB2238	60.0	2	0.290
HGB2238	60.0	3	0.311
HGB2238	75.0	1	0.273
HGB2238	75.0	2	0.252
HGB2238	75.0	3	0.288
HGB2239	0.0	1	0.401
HGB2239	0.0	2	0.471
HGB2239	0.0	3	0.432
HGB2239	30.0	1	0.355
HGB2239	30.0	2	0.401
HGB2239	30.0	3	0.395
HGB2239	45.0	1	0.374
HGB2239	45.0	2	0.348
HGB2239	45.0	3	0.367
HGB2239	60.0	1	0.377
HGB2239	60.0	2	0.405
HGB2239	60.0	3	0.404
HGB2239	75.0	1	0.414
HGB2239	75.0	2	0.396
HGB2239	75.0	3	0.425
HGB1333	0.0	1	0.472
HGB1333	0.0	2	0.503
HGB1333	0.0	3	0.446
HGB1333	30.0	1	0.006
HGB1333	30.0	2	0.005
HGB1333	30.0	3	0.004
HGB1333	45.0	1	0.006
HGB1333	45.0	2	0.004
HGB1333	45.0	3	0.008
HGB1333	60.0	1	0.002
HGB1333	60.0	2	0.003
HGB1333	60.0	3	0.001
HGB1333	75.0	1	0.003
HGB1333	75.0	2	0.005
HGB1333	75.0	3	0.002
