# Supplementary material for: Agrobacterium Is a Proposed Suitable System for Bioassays and Resistance Studies on Antimicrobial Peptides with Plant Protection Potential
Source: Preprints.org preprint supplement (doi:10.20944/preprints202311.0120.v1), 2023-11-02
Supplement: Supplementary file 1 [file supplementary]

**Table S1** Origin of the *Agrobacterium* Strains (To Line 345 of the Resubmitted MS Peer\_J\_24535

| Name   | From                                                                         | Deposited by | Opine    | Plasmid      | S /R Phenotype<br>To EMA_CFCM in<br>Agar Diffusion Test |
|--------|------------------------------------------------------------------------------|--------------|----------|--------------|---------------------------------------------------------|
| HP1836 | NAIK<br>Biotechnology<br>Institute<br>Gödöllő<br>Hungary<br><br>Dr. Olasz    | B. Dudás     | Nopaline | Cured        | R                                                       |
| HP1837 |                                                                              | B. Dudás     | Octopine | Helper       | S                                                       |
| HP1839 |                                                                              | B. Dudás     | Nopaline | Helper       | S                                                       |
| HP1840 |                                                                              | B. Dudás     | Nopaline | Cured        | R                                                       |
| HP1841 |                                                                              | D. Silhavy   | Nopaline | Cured        | R                                                       |
| HP1842 |                                                                              | V. Tisza     | Nopaline | Cured        | R                                                       |
| HP1843 |                                                                              | G.B. Kiss    | Nopaline | Cured        | R                                                       |
| HP1838 |                                                                              | B. Dudás     | Agropine | Intact       | R                                                       |
| SZL1   | BRC Hungarian<br>Academy of<br>Sciences,<br>Szeged, Hungary,<br>Dr. Szabados | Szabados     | Agropine | Helper + Bin | S                                                       |
| SZL2   |                                                                              | Szabados     | Octopine | Helper + Bin | R                                                       |
| SZL3   |                                                                              | Szabados     | Agropine | Helper + Bin | S                                                       |
| SZL4   |                                                                              | Szabados     | Nopaline | Helper + Bin | S                                                       |

**Footnotes to Table S1:** For all other information, see MS\_Peer\_J\_34535 Table 1.
