# Supplementary material for: Agrobacterium Is a Proposed Suitable System for Bioassays and Resistance Studies on Antimicrobial Peptides with Plant Protection Potential
Source: Preprints.org preprint supplement (doi:10.20944/preprints202311.0120.v1), 2023-11-02
Supplement: Supplementary file 2 [file Suppl._File_6_Raw_Data_for_Fig_5_Fig_S1_and_Fig_S2_Peer_J_24535_Resubmission.xlsx]

## Sheet: Sheet1
OD VALUES EMA_PF2 LIQUID BIOASSAYS
ON AGROBACTERIUM STRAINS
STRAIN	DOSE	Replicate	OD values
HP 1836	0	1	0.868
HP 1836	0	2	0.987
HP 1836	0	3	1
HP 1836	30	1	0.735
HP 1836	30	2	0.759
HP 1836	30	3	0.724
HP 1836	45	1	0.624
HP 1836	45	2	0.632
HP 1836	45	3	0.648
HP 1836	60	1	0.645
HP 1836	60	2	0.672
HP 1836	60	3	0.67
HP 1836	75	1	0.623
HP 1836	75	2	0.635
HP 1836	75	3	0.659
HP1840	0	1	0.954
HP1840	0	2	0.887
HP1840	0	3	1
HP1840	30	1	0.384
HP1840	30	2	0.376
HP1840	30	3	0.283
HP1840	45	1	0.637
HP1840	45	2	0.627
HP1840	45	3	0.63
HP1840	60	1	0.572
HP1840	60	2	0.565
HP1840	60	3	0.455
HP1840	75	1	0.751
HP1840	75	2	0.669
HP1840	75	3	0.693
HP1841	0	1	0.95
HP1841	0	2	0.992
HP1841	0	3	1
HP1841	30	1	0.393
HP1841	30	2	0.46
HP1841	30	3	0.502
HP1841	45	1	0.41
HP1841	45	2	0.442
HP1841	45	3	0.484
HP1841	60	1	0.293
HP1841	60	2	0.323
HP1841	60	3	0.414
HP1841	75	1	0.411
HP1841	75	2	0.509
HP1841	75	3	0.531
HP1842	0	1	0.754
HP1842	0	2	0.711
HP1842	0	3	1
HP1842	30	1	0.808
HP1842	30	2	0.935
HP1842	30	3	0.777
HP1842	45	1	0.737
HP1842	45	2	0.804
HP1842	45	3	0.823
HP1842	60	1	0.708
HP1842	60	2	0.741
HP1842	60	3	0.763
HP1842	75	1	0.703
HP1842	75	2	0.872
HP1842	75	3	0.882
HP1843	0	1	0.992
HP1843	0	2	0.996
HP1843	0	3	1
HP1843	30	1	0.73
HP1843	30	2	0.763
HP1843	30	3	0.774
HP1843	45	1	0.765
HP1843	45	2	0.803
HP1843	45	3	0.818
HP1843	60	1	0.701
HP1843	60	2	0.81
HP1843	60	3	0.812
HP1843	75	1	0.825
HP1843	75	2	0.869
HP1843	75	3	0.922
SZL4	0	1	0.908
SZL4	0	2	0.912
SZL4	0	3	1
SZL4	30	1	0.808
SZL4	30	2	0.935
SZL4	30	3	0.777
SZL4	45	1	0.737
SZL4	45	2	0.804
SZL4	45	3	0.823
SZL4	60	1	0.708
SZL4	60	2	0.741
SZL4	60	3	0.763
SZL4	75	1	0.703
SZL4	75	2	0.878
SZL4	75	3	0.882
HP1837	0	1	0.53
HP1837	0	2	0.864
HP1837	0	3	1
HP1837	30	1	0.163
HP1837	30	2	0.167
HP1837	30	3	0.181
HP1837	45	1	0.137
HP1837	45	2	0.121
HP1837	45	3	0.128
HP1837	60	1	0.133
HP1837	60	2	0.147
HP1837	60	3	0.149
HP1837	75	1	0.176
HP1837	75	2	0.183
HP1837	75	3	0.186
SZL2	0	1	0.942
SZL2	0	2	0.994
SZL2	0	3	1
SZL2	30	1	0.318
SZL2	30	2	0.353
SZL2	30	3	0.459
SZL2	45	1	0.323
SZL2	45	2	0.342
SZL2	45	3	0.429
SZL2	60	1	0.306
SZL2	60	2	0.31
SZL2	60	3	0.315
SZL2	75	1	0.227
SZL2	75	2	0.27
SZL2	75	3	0.337
HP1838	0	1	0.957
HP1838	0	2	0.999
HP1838	0	3	1
HP1838	30	1	0.817
HP1838	30	2	0.853
HP1838	30	3	0.887
HP1838	45	1	0.787
HP1838	45	2	0.803
HP1838	45	3	0.83
HP1838	60	1	0.726
HP1838	60	2	0.734
HP1838	60	3	0.758
HP1838	75	1	0.796
HP1838	75	2	0.876
HP1838	75	3	0.916
HP1839	0	1	0.923
HP1839	0	2	0.988
HP1839	0	3	1
HP1839	30	1	0.02
HP1839	30	2	0.022
HP1839	30	3	0.023
HP1839	45	1	0.024
HP1839	45	2	0.042
HP1839	45	3	0.06
HP1839	60	1	0.052
HP1839	60	2	0.054
HP1839	60	3	0.02
HP1839	75	1	0.014
HP1839	75	2	0.018
HP1839	75	3	0.022
SZL1	0	1	0.649
SZL1	0	2	0.929
SZL1	0	3	1
SZL1	30	1	0.048
SZL1	30	2	0.052
SZL1	30	3	0.053
SZL1	45	1	0.032
SZL1	45	2	0.038
SZL1	45	3	0.039
SZL1	60	1	0.032
SZL1	60	2	0.032
SZL1	60	3	0.033
SZL1	75	1	0.045
SZL1	75	2	0.05
SZL1	75	3	0.071
SZL3	0	1	0.485
SZL3	0	2	0.505
SZL3	0	3	1
SZL3	30	1	0.043
SZL3	30	2	0.046
SZL3	30	3	0.054
SZL3	45	1	0.071
SZL3	45	2	0.037
SZL3	45	3	0.103
SZL3	60	1	0.06
SZL3	60	2	0.063
SZL3	60	3	0.069
SZL3	75	1	0.057
SZL3	75	2	0.067
SZL3	75	3	0.072
