# Supplementary material for: Agrobacterium Is a Proposed Suitable System for Bioassays and Resistance Studies on Antimicrobial Peptides with Plant Protection Potential
Source: Preprints.org preprint supplement (doi:10.20944/preprints202311.0120.v1), 2023-11-02
Supplement: Supplementary file 3 [file Suppl._File_7_Raw_Data_for_Table_2_MS_Peer_J_24535_Resubmission.xlsx]

## Sheet: Sheet1
EMA30*	0.2	2	1385				EMAPF1	0.0	1	4520
EMA30*	0.2	3	1520				EMAPF1	0.0	2	4520
EMA30*	0.4	1	1620				EMAPF1	0.0	3	3800			ABBREVIATIONS:
EMA30*	0.4	2	1650				EMAPF1	0.2	1	3800			TEST ORGANISMS
EMA30*	0.4	3	1700				EMAPF1	0.2	2	3140			0.0 = HGB1795]
EMA30*	0.5	1	1661				EMAPF1	0.2	3	4520			0.2 = HGB2226].
EMA30*	0.5	2	1661				EMAPF1	0.4	1	8030			0.4 = S.aureus]
EMA30*	0.5	3	1256				EMAPF1	0.4	2	9070			0.5 = Candida]
Hp40	0.0	1	1017				EMAPF1	0.4	3	9070
Hp40	0.0	2	1133				EMAPF1	0.5	1	11340
Hp40	0.0	3	1256				EMAPF1	0.5	2	11340		Captive / Footnotes to Table 2: Agar-Diffusion Bioassays of Antimicrobial Activities of Peptide Fractions Isolated from EMA CFCM: Inactivation Zone Sizes (IZ values) Determined in Four Targets Agar-Diffusion test.
Hp40	0.2	1	706				EMAPF1	0.5	3	12560		Antimicrobial Activities of Peptide Fractions Isolated from EMA CFCM were determined in four targets in Agar-Diffusion test. Inactivation zones were calculated from the diameter of inactivation zone in 1-cm tick LBA plates and given in mm3.
Hp40	0.2	2	530				EMAPF2	0.0	1	6280
Hp40	0.2	3	615				EMAPF2	0.0	2	6925		Abbreviations:
Hp40	0.4	1	1520				EMAPF2	0.2	1	4535
Hp40	0.4	2	1661				EMAPF2	0.2	2	4015		AMP Fractions:
Hp40	0.4	3	1661				EMAPF2	0.2	3	3530
Hp40	0.5	1	2289				EMAPF2	0.2	4	2655		EMA_PF1: A peptide fraction isolated from the cell-free culture medium (CFCM) of Xenorhabdus budapestensis (EMA). EMA_PF1is a fraction supposed to be containing molecules of MW > 10,000 D. We suppose that the large peptides of PF1 this fraction adsorbed the smaller active peptides and we detected the activity of the complex rather than antimicrobial activity of peptides of MW > 10,000 D.
Hp40	0.5	2	2289				EMAPF2	0.4	1	5670
Hp40	0.5	3	2289				EMAPF2	0.4	2	5670		EMA_PF2 (PF2) consists of peptides of MW < 10,000 D;
Hp43	0.0	1	2289				EMAPF2	0.4	3	6455		EMA_PF2*20, EMA_PF2*30, EMA_PF2*40, EMA_PF2*50 and EMA_PF2*70: EMA_PF2 was further fractionated by, RPLC, and fractions eluted by 20. 30, 40, 50 and 70 V/V% of AN containing 0.1% TFA, freeze-dried, taken up by PBS and bio-assayed. TF: fraction which did not adsorb to the column.
Hp43	0.0	2	1808				EMAPF2	0.5	1	5670
Hp43	0.0	3	2123				EMAPF2	0.5	2	6280		EMA_ (RPLC) 30 or (EMA30) also mentioned as AF103 (as HPLC sample) is a purified fraction of EMA PF by Reverse Phase Column Chromatography; eluted with 30 V/V% AN. (This was the only RPLC fraction active on Gram-negative targets).
Hp43	0.2	1	1661				EMAPF2	0.5	3	6925		AF103_ (EMA) _HPLC40, AF103_ (EMA) _HPLC43 and AF103_ (EMA) _HPLC44 HPLC sub-fractions of EMA30 (AF103) collected in the 40th, 43rd, and 44th minute of the run of sample AF103.
Hp43	0.2	2	1661				PF2*20	0.0	1	4069
Hp43	0.2	3	1520				PF2*20	0.0	2	3215		Test organisms: HGB2226 = Escherichia coli (E. coli) mutator strain of Km® Cm® genotype, constructed by us (as a Gram-negative target); HGB1795 = a transposon-induced insertion mutant of the XNC1_2022 gene (Gene ID: 9430524; Gene Page Link: NCBI UniProtKB; Locus Tag: XNC1_2022 see gene page for GenePage for the XNC1_2022 gene EcoGene-RefSeq) from Xenorhabdus nematophila (strain ATCC 19061 / DSM 3…
Hp43	0.4	1	1925				PF2*20	0.0	3	2826
Hp43	0.4	2	1925				PF2*20	0.2	1	0
Hp43	0.4	3	1809				PF2*20	0.2	2	0
Hp43	0.5	1	3216				PF2*20	0.2	3	0
Hp43	0.5	2	2641				PF2*20	0.4	1	0
Hp43	0.5	3	2933				PF2*20	0.4	2	0
Hp44	0.0	1	1385				PF2*20	0.4	3	0
Hp44	0.0	2	1384				PF2*20	0.5	1	530
Hp44	0.0	3	1386				PF2*20	0.5	2	530
Hp44	0.2	1	1134				PF2*20	0.5	3	530
Hp44	0.2	2	907				PF2*30	0.0	1	4069
Hp44	0.2	3	1017				PF2*30	0.0	2	2462
Hp44	0.4	1	1661				PF2*30	0.0	3	2826
Hp44	0.4	2	1661				PF2*30	0.2	1	0
Hp44	0.4	3	1519				PF2*30	0.2	2	0
Hp44	0.5	1	3216				PF2*30	0.2	3	0
Hp44	0.5	2	2461				PF2*30	0.4	1	0
Hp44	0.5	3	2826				PF2*30	0.4	2	0
							PF2*30	0.4	3	0
							PF2*30	0.5	1	379
							PF2*30	0.5	2	907
							PF2*30	0.5	3	803
							PF2*40	0.0	1	3419
							PF2*40	0.0	2	4069
							PF2*40	0.0	2	4776
							PF2*40	0.2	1	0
							PF2*40	0.2	2	0
							PF2*40	0.2	3	0
							PF2*40	0.4	1	0
							PF2*40	0.4	2	0
							PF2*40	0.4	3	0
							PF2*40	0.5	1	803
							PF2*40	0.5	2	452
							PF2*40	0.5	3	379
							PF2*50	0.0	1	4069
							PF2*50	0.0	2	3698
							PF2*50	0.0	3	3698
							PF2*50	0.2	1	0
							PF2*50	0.2	2	0
							PF2*50	0.2	3	0
							PF2*50	0.4	1	0
							PF2*50	0.4	2	0
							PF2*50	0.4	3	0
							PF2*50	0.5	1	0
							PF2*50	0.5	2	0
							PF2*50	0.5	3	0
							PF2*70	0.0	1	5539
							PF2*70	0.0	2	3847
							PF2*70	0.0	3	4534
							PF2*70	0.2	1	0
							PF2*70	0.2	2	0
							PF2*70	0.2	3	0
							PF2*70	0.4	1	0
							PF2*70	0.4	2	0
							PF2*70	0.4	3	0
							PF2*70	0.5	1	452
							PF2*70	0.5	2	615
							PF2*70	0.5	3	803
							PF2*TF	0.0	1	5278
							PF2*TF	0.0	2	4776
							PF2*TF	0.0	3	2462
							PF2*TF	0.2	1	0
							PF2*TF	0.2	2	0
							PF2*TF	0.2	3	0
							PF2*TF	0.4	1	0
							PF2*TF	0.4	2	0
							PF2*TF	0.4	3	0
							PF2*TF	0.5	1	615
							PF2*TF	0.5	2	530
							PF2*TF	0.5	3	530
