# Supplementary material for: Agrobacterium Is a Proposed Suitable System for Bioassays and Resistance Studies on Antimicrobial Peptides with Plant Protection Potential
Source: Preprints.org preprint supplement (doi:10.20944/preprints202311.0120.v1), 2023-11-02
Supplement: Supplementary file 4 [file Suppl._File_9_Raw_Data_for_Table_3_MS_PEER_J_24535.xlsx]

## Sheet: Sheet1
TEST ORGANISM		HPLC FR	REPL.	OD
S. aureus	JE	1	1	0.3572
S. aureus	JE	1	2	0.3583
S. aureus	JE	2	1	0.4416
S. aureus	JE	2	2	0.4393
S. aureus	JE	3	1	0.4273
S. aureus	JE	3	2	0.4274
S. aureus	JE	4	1	0.4590
S. aureus	JE	4	2	0.4587
S. aureus	JE	5	1	0.4043
S. aureus	JE	5	2	0.4011
S. aureus	JE	6	1	0.3847
S. aureus	JE	6	2	0.3901
S. aureus	JE	7	1	0.4233
S. aureus	JE	7	2	0.4277
S. aureus	JE	8	1	0.0004
S. aureus	JE	8	2	0.0002
S. aureus	JE	9	1	0.0002
S. aureus	JE	9	2	0.0004
S. aureus	JE	10	1	0.0083
S. aureus	JE	10	2	0.0078
S. aureus	JE	11	1	0.0039
S. aureus	JE	11	2	0.0041
E. coli	HGB2226	1	1	0.5382
E. coli	HGB2226	1	2	0.5378
E. coli	HGB2226	2	1	0.4216
E. coli	HGB2226	2	2	0.4213
E. coli	HGB2226	3	1	0.4337
E. coli	HGB2226	3	2	0.4334
E. coli	HGB2226	4	1	0.4635
E. coli	HGB2226	4	2	0.4615
E. coli	HGB2226	5	1	0.4818
E. coli	HGB2226	5	2	0.4809
E. coli	HGB2226	6	1	0.4665
E. coli	HGB2226	6	2	0.4637
E. coli	HGB2226	7	1	0.4398
E. coli	HGB2226	7	2	0.4393
E. coli	HGB2226	8	1	0.0020
E. coli	HGB2226	8	2	0.0011
E. coli	HGB2226	9	1	0.0001
E. coli	HGB2226	9	2	0.0003
E. coli	HGB2226	10	1	0.0011
E. coli	HGB2226	10	2	0.0010
E. coli	HGB2226	11	1	0.0017
E. coli	HGB2226	11	2	0.0013
