# Supplementary material for: Agrobacterium Is a Proposed Suitable System for Bioassays and Resistance Studies on Antimicrobial Peptides with Plant Protection Potential
Source: Preprints.org preprint supplement (doi:10.20944/preprints202311.0120.v1), 2023-11-02
Supplement: Supplementary file 4 [file supplementary]

**TABLE S4 A:** OD 30-75 Values: Means  $\pm$  Standard Deviations

| <i>Agrobacterium</i><br>strains | N  | OD <sub>30-75</sub><br>Mean $\pm$ SE |            |  |
|---------------------------------|----|--------------------------------------|------------|--|
| HP1836                          | 12 | 0.66883333 $\pm$                     | 0.04599769 |  |
| HP1837                          | 12 | 0.15591667 $\pm$                     | 0.02306693 |  |
| HP1838                          | 12 | 0.81525000 $\pm$                     | 0.06015000 |  |
| HP1839                          | 12 | 0.03091667 $\pm$                     | 0.01625623 |  |
| HP1840                          | 12 | 0.55350000 $\pm$                     | 0.14573232 |  |
| HP1841                          | 12 | 0.43513333 $\pm$                     | 0.06826824 |  |
| HP1842                          | 12 | 0.79608333 $\pm$                     | 0.07247502 |  |
| HP1843                          | 12 | 0.79933333 $\pm$                     | 0.05940054 |  |
| SZ1                             | 12 | 0.04375000 $\pm$                     | 0.01183312 |  |
| SZL2                            | 12 | 0.33241667 $\pm$                     | 0.04599769 |  |
| SZL3                            | 12 | 0.66883333 $\pm$                     | 0.06230199 |  |
| SZL4                            | 12 | 0.06183333 $\pm$                     | 0.0172459  |  |

| TABLE S4 B: Duncan’s Multiple Range test of the OD 30-75 VALUES           |       |                 |       |       |         |       |       |       |         |       |       |
|---------------------------------------------------------------------------|-------|-----------------|-------|-------|---------|-------|-------|-------|---------|-------|-------|
| Alpha = 0.05; Error Degrees of Freedom: 22; Error Mean Square = 40.23677; |       |                 |       |       |         |       |       |       |         |       |       |
| No of Means                                                               |       |                 |       | 2     |         |       | 3     |       |         | 4     |       |
| Critical Range                                                            |       |                 |       | 6.201 |         |       | 6.512 |       |         | 6.710 |       |
| No of Means                                                               | 2     | 3               | 4     | 5     | 6       | 7     | 8     | 9     | 10      | 11    | 12    |
| Critical Range                                                            | 10.74 | 11.28           | 11.62 | 11.86 | 12.04   | 12.18 | 12.29 | 12.38 | 12.45   | 12.50 | 12.55 |
|                                                                           |       | DC              |       |       |         |       |       |       |         |       |       |
| Duncan’s Groups                                                           |       |                 |       |       |         |       |       |       |         |       |       |
| Super group                                                               |       | Duncan’s Groups |       |       | STRAINS |       | N     |       | MEAN    |       |       |
| EMA RESISTANT                                                             |       | DC              |       |       | STRAINS |       | N     |       | MEAN    |       |       |
|                                                                           |       | A               |       |       | HP1838  |       | 12    |       | 0.81525 |       |       |
|                                                                           |       | A               |       |       | HP1843  |       | 12    |       | 0.79933 |       |       |
|                                                                           |       | A               |       |       | SZL004  |       | 12    |       | 0.79658 |       |       |
|                                                                           |       | B               |       |       | HP1836  |       | 12    |       | 0.66883 |       |       |
|                                                                           |       | C               |       |       | HP1840  |       | 12    |       | 0.55350 |       |       |
|                                                                           |       | D               |       |       | HP1841  |       | 15    |       | 0.43513 |       |       |
|                                                                           |       | E               |       |       | SZL002  |       | 12    |       | 0.33242 |       |       |
| EMA SENSITIVE                                                             |       | F               |       |       | HP1837  |       | 12    |       | 0.15592 |       |       |
|                                                                           |       | G               |       |       | SZL003  |       | 12    |       | 0.06183 |       |       |
|                                                                           |       | G               |       |       | SZ001   |       | 12    |       | 0.04375 |       |       |
|                                                                           |       | G               |       |       | HP1839  |       | 12    |       | 0.03092 |       |       |

**Footnotes to Table S4:** The data analysis was performed using [SAS/STAT] software, Version [9.4] of the SAS System for [Windows X 64 Based Systems]; (Copyright © [2013 of copyright]; SAS Institute Inc. SAS, Cary, NC, USA, see Footnotes to Table S3. The significance of differences of the means ( $\alpha = 0.05$ ) were determined here by using Duncan's Multiple Range Tests, depending upon the experiment as a part of the Anova Procedure. Duncan's Multiple Range Test of OD<sub>30-75</sub> values measured in Liquid Culture Bioassay of EMA PF on *Agrobacterium* strains. **Abbreviations:** EMA PF: Antimicrobially Peptid Rich Fraction from the cell-free culture media (CFCM) of *Xenorhabdus budapestensis* (EMA) (AF13), see Vozik et al., 2015. MIC: minimal inactivation concentration. For HP1837: MIC<sub>75</sub>; for HP1839, SZL1 & SZL3: MIC<sub>90</sub>. We have been considering the Duncan's Multiple Range test as the most accurate to distinguish between experimental groups reacting differently to the same treatments. The means within a given Duncan's Group labelled with a letter, say, with letter A, may differ from each other, but the SD values overlap; but differ significantly from those belonging to another Duncan's Group, labelled, say, letter B, are significantly different at P=0.05 level. We overchecked each case with t(LSD) tests as well (data are not given), and found that the Duncan's Multiple Range Tests were completely fair.

The ANOVA-based Duncan's Multiple Range test of the OD (30-75) of the EMA\_PF treated *Agrobacterium* strains scored them to **7 Duncan's Groups (DG)**; and we scored the 7 Duncan's Groups to 2 clearly unambiguously separable "Super-Groups", (**Table S3B**).

Four *Agrobacterium* strains of S phenotype, including HP1837 of Duncan's Group F); HP1839, SZL1, and SZL3 of Duncan's Group G) were scored to **Duncan's Super-Group I**.

The rest of the *Agrobacterium* strains are of the R phenotype, including the wild-type (TDNA) (+) AGR strain HP1838 (of Duncan's Group A); the pMP90 helper-plasmid harboring SZL4 and plasmid-cured (HP1836, HP1840; HP1841; HP1842; HP 1843)), all nopaline catabolizing strains belonging to Duncan's Groups A-D); as well as one (SZL2) of the two octopine catabolizing strains examined, were scored to **Duncan's Super-Group II**.
