# Supplementary material for: Agrobacterium Is a Proposed Suitable System for Bioassays and Resistance Studies on Antimicrobial Peptides with Plant Protection Potential
Source: Preprints.org preprint supplement (doi:10.20944/preprints202311.0120.v1), 2023-11-02
Supplement: Supplementary file 5 [file supplementary]

**Table S2** *Xenorhabdus* Antimicrobial Peptide-Rich Fractions Separated from EMA CFCM. Two of which (EMA\_PF2 and EMA<sub>30</sub>) were selected for Liquid Bioassays in *Agrobacterium* Bioassays

| Name Of Preparation |        | Origin | WAY OF PURIFICATION                      | Agar Diffusion Bioassay on |            |             |       |
|---------------------|--------|--------|------------------------------------------|----------------------------|------------|-------------|-------|
|                     |        |        |                                          | SA <sup>R</sup> JE         | EC HGB2226 | XN HGB 1975 | CA JE |
| EMAPF               |        | EMAPF  | AmberlitR XAD1180; Methanol elution      | +++                        | +++        | +++         | +++   |
| EMAPF1              |        |        | Ultrafiltration; MW > 10,000 D fraction  | +++                        | +++        | +++         | +++   |
| EMAPF2              |        |        | Ultraliltration; MW < 10,000 D fraction; | +++                        | +++        | +++         | +++   |
| EMA <sub>(30)</sub> | AF103* | CFCM   | RPCC; Eluted with 30 % AN / 0.1% TFA     | +++                        | +++        | +++         | +++   |
| HPLC Fraction 40    |        | AF103* | HPLC                                     | +++                        | +++        | +++         | +++   |
| HPLC Fraction 43    |        |        | HPLC                                     | +++                        | +++        | +++         | +++   |
| HPLC Fraction 44    |        |        | HPLC                                     | +++                        | +++        | +++         | +++   |

**Footnotes to Table S2:** +++ = very strong antimicrobial activity; Abbreviations: EMA= *Xenorhabdus budapestensis* HGB033; CFCM = Cell-Free Culture Medium; PF = Peptide Rich Fraction; \* = Name of HPLC Sample; RPCC = Reverse Phase Column Chromatography; Test organisms; CA = *Candida albicans*; SA = *Staphylococcus aureus*; EC = *Escherichia coli* HGB2226; XN = a *Xenorhabdus nematophila* lab isolate which is extreme sensitive to *Xenorhabdus* antibiotics. **HGB1795** is a transposon-induced insertion mutant of the XNC1\_2022 gene (Gene ID: 9430524; Gene Page Link: NCBI UniProtKB; Locus Tag: XNC1\_2022 see gene page for GenePage for the XNC1\_2022 gene EcoGene-RefSeq) from *X. nematophila* (strain ATCC 19061 / DSM 3370 / LMG 1036 / NCIB 9965 / AN6), provided by Prof. Helge Bode via Prof. Heidi Goodrich-Blair. We used this mutant since previously Bicornutin A was believed as the active EMA antibiotic molecule (Böszörményi et al., 2009) and the XNC1\_2022 gene of *X. nematophila* was believed to be a homologue of *X. budapestensis* *NrpS* (*nrpS*) gene, (GenBank: Accession Number is JX424818.1; gene synonym="bicA) which is responsible for the biosynthesis of Bicornutin A (Fuchs et al., 2012). It turned out that it is not the case. However, some role in the scenario related to antibiotics activity and self-resistance cannot be ruled out, since Bicornutin A and fabclavine coexist in our peptide-preparations.
